# Supplementary material
Source: Springer Nature journal article supplement (https://www.springermedizin.de/resource/supplementary/13046_2009_154_MOESM5_ESM.pdf/9661748)

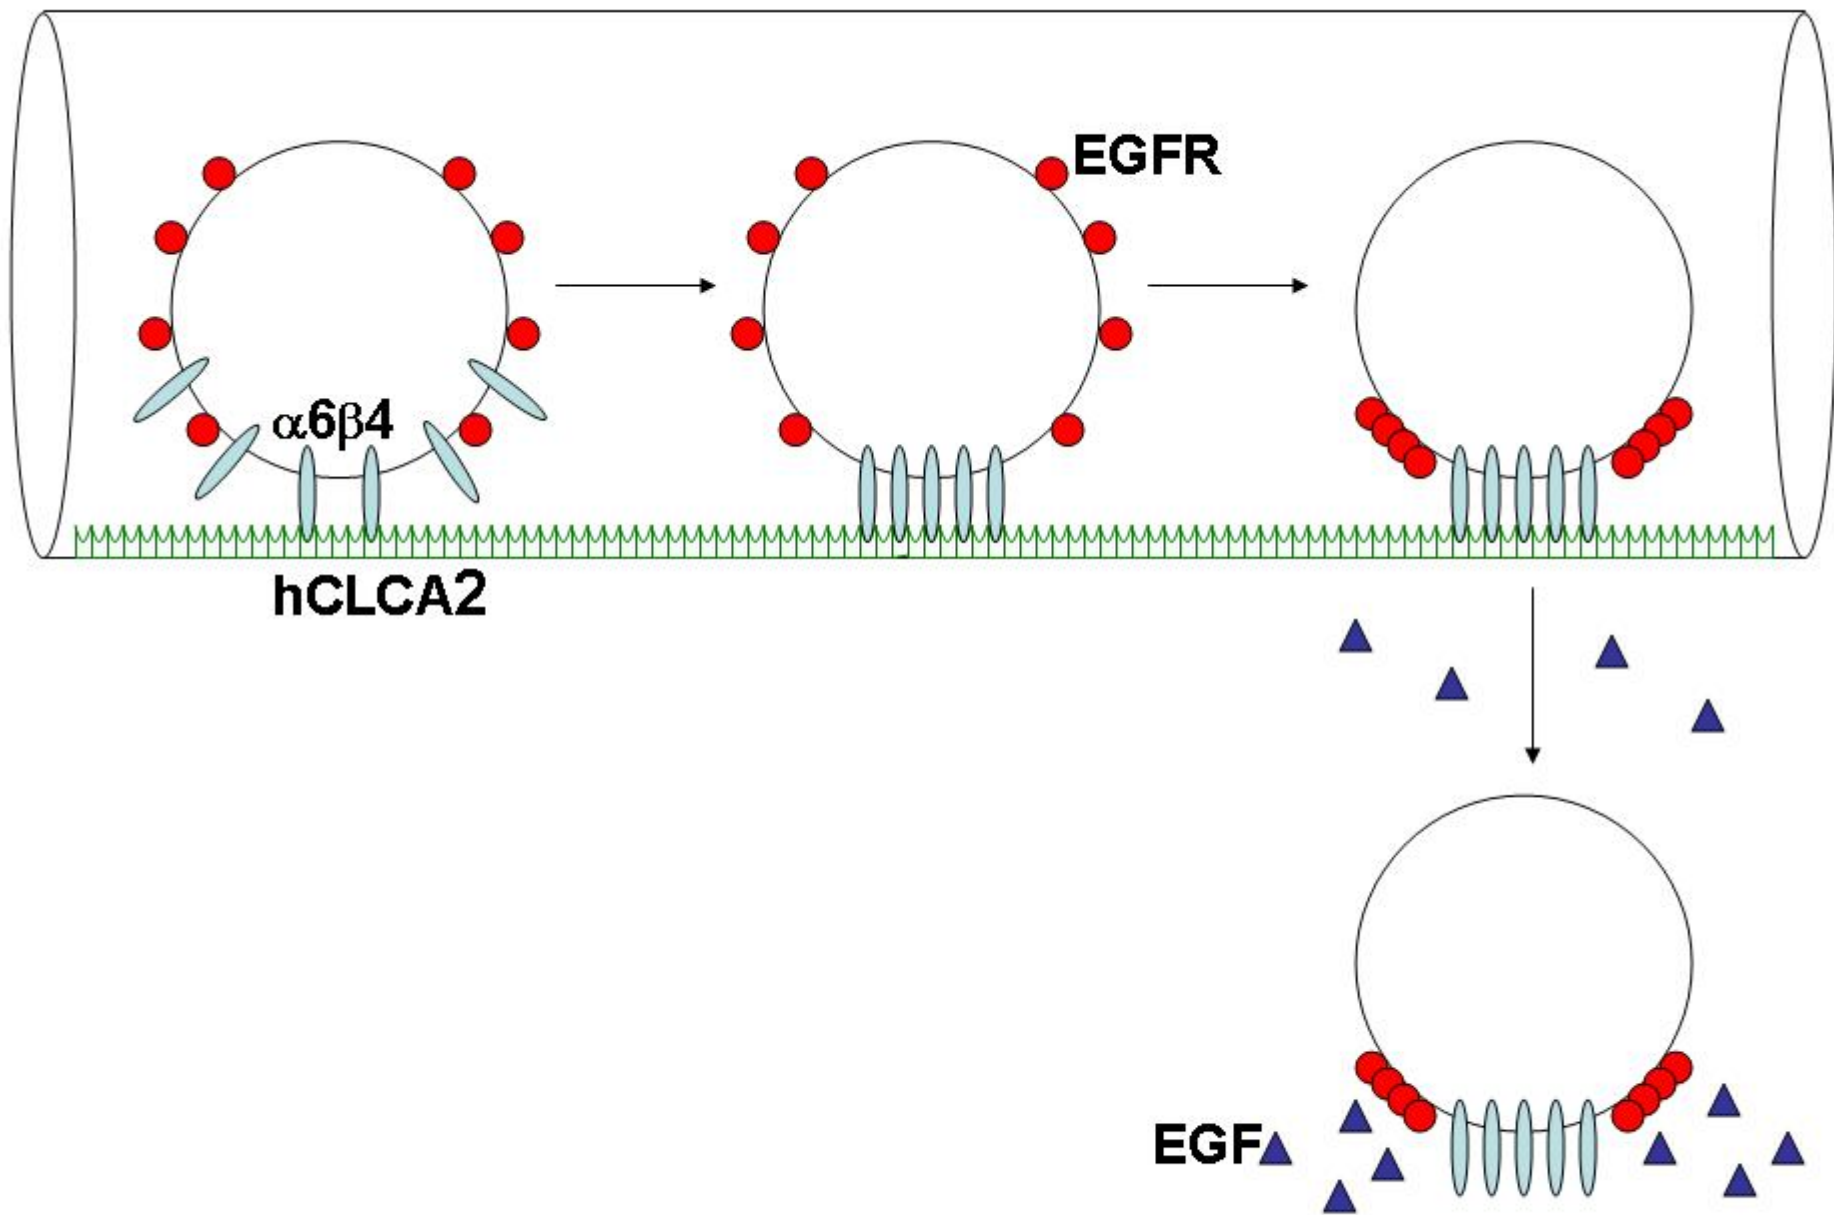

Supplement: MOESM5 [file 9661748]
